# Supplementary material
Source: MDPI journal article supplement (https://www.mdpi.com/2075-4698/9/3/61)
Supplement: s1 [file s1]

Supplementary data

**Table S1:** Hit count results for articles mentioning the different Neuro-advancements in conjunction with “nurs\*” in the abstracts

| <b>First Search Term</b>  | <b>Second Search Term</b> | <b>Hit count</b> |
|---------------------------|---------------------------|------------------|
| <b>Abstract</b>           | <b>Abstract</b>           | <b>Total</b>     |
| “nurs*”                   |                           | 1 217 965        |
| <b>Neuroterms</b>         |                           |                  |
| “nurs*”                   | “Neurosc*”                | 1944             |
| “nurs*”                   | “Neuroen*”                | 434              |
| “nurs*”                   | “Neurote*”                | 4                |
| <b>Neuro-advancements</b> |                           |                  |
| “nurs*”                   | "virtual reality"         | 438              |
| “nurs*”                   | "VR"                      | 298              |
| “nurs*”                   | "neuroimaging"            | 180              |
| “nurs*”                   | "brain stimul*"           | 136              |
| “nurs*”                   | "ECoG"                    | 124              |
| “nurs*”                   | "cognitive stim*"         | 122              |
| “nurs*”                   | "deep brain stim*"        | 120              |
| “nurs*”                   | "DBS"                     | 68               |
| “nurs*”                   | “human computer”          | 65               |

|         |                               |    |
|---------|-------------------------------|----|
| "nurs*" | "neuromodula*"                | 64 |
| "nurs*" | "brain imaging"               | 59 |
| Nus*    | "cochlear implant"            | 36 |
| "nurs*" | "cognitive enhanc*"           | 29 |
| "nurs*" | "TMS"                         | 26 |
| "nurs*" | "transcranial magnetic stim*" | 24 |
| "nurs*" | "BCI"                         | 23 |
| "nurs*" | "brain computer"              | 17 |
| "nurs*" | "Brain-computer interface"    | 16 |
| "nurs*" | "neurostim*"                  | 15 |
| "nurs*" | "Sacral nerve stimulation"    | 11 |
| "nurs*" | "Neural stem cell"            | 6  |
| "nurs*" | "Electrocorticogra*"          | 6  |
| "nurs*" | "neurofeedback*"              | 5  |
| "nurs*" | "Spinal cord stimulator"      | 4  |
| "nurs*" | "Nootropics"                  | 3  |
| "nurs*" | "tDCS"                        | 3  |
| "nurs*" | "EEG biofeedback"             | 1  |
| "nurs*" | "neurosens*"                  | 1  |
| "nurs*" | "brain inform*"               | 0  |

|         |                                          |   |
|---------|------------------------------------------|---|
| "nurs*" | "neuroinform*"                           | 0 |
| "nurs*" | "intracranial<br>electroencephalography" | 0 |
| "nurs*" | "NSC"                                    | 0 |
| "nurs*" | "NFB"                                    | 0 |
| "nurs*" | "CoriQ"                                  | 0 |
| "nurs*" | "iEEG"                                   | 0 |
| "nurs*" | "subvocal"                               | 0 |
| "nurs*" | "cranial electrotherapy stim*"           | 0 |
| "nurs*" | "brain feedback*"                        | 0 |
| "nurs*" | "brain machine"                          | 0 |
| "nurs*" | "fEMG"                                   | 0 |
| "nurs*" | "HEG"                                    | 0 |
| "nurs*" | "hemoencephalogra*"                      | 0 |
| "nurs*" | "artificial brain"                       | 0 |
| "nurs*" | "transcranial direct current stim*"      | 0 |
| "nurs*" | "optogenetics"                           | 0 |
| "nurs*" | "artificial hippocampus"                 | 0 |
| "nurs*" | "auditory brainstem"                     | 0 |
| "nurs*" | "bionic eye"                             | 0 |

|         |                                       |   |
|---------|---------------------------------------|---|
| "nurs*" | "brain to speech"                     | 0 |
| "nurs*" | "brain-to-text"                       | 0 |
| "nurs*" | "cognitive tech*"                     | 0 |
| "nurs*" | "collaborative cognitive simulations" | 0 |
| "nurs*" | "cortical modem"                      | 0 |
| "nurs*" | "DACI"                                | 0 |
| "nurs*" | "darpa ram sensor"                    | 0 |
| "nurs*" | "deep mind"                           | 0 |
| "nurs*" | "Ear-EEG"                             | 0 |
| "nurs*" | "Exocortex"                           | 0 |
| "nurs*" | "Facial electromyography"             | 0 |
| "nurs*" | "God Helmet"                          | 0 |
| "nurs*" | "Hippocampus prosthesis"              | 0 |
| "nurs*" | "Muse headband"                       | 0 |
| "nurs*" | "Neuralink"                           | 0 |
| "nurs*" | "Neurochip"                           | 0 |
| "nurs*" | "cognitive imag*"                     | 0 |
| "nurs*" | "Prosthetic memory device"            | 0 |
| "nurs*" | "Pulsed electromagnetic field"        | 0 |

|         |                               |   |
|---------|-------------------------------|---|
|         | therapy"                      |   |
| "nurs*" | "Responsive neurostimulation" | 0 |
| "nurs*" | "Speech BCI"                  | 0 |
| "nurs*" | "THync mood altering headset" | 0 |
| "nurs*" | "whole brain emulat*"         | 0 |

**Table S2:** Hit count results for articles mentioning the different Neuro-advancements in the abstract within journals that had "nurs\*" in the title of the journal

| Search term:<br>Journal/Source Title | Search term:<br>Abstract | Hit count<br>Total |
|--------------------------------------|--------------------------|--------------------|
| "nurs*"                              |                          | 1 805 068          |
| <b>Neuroterms</b>                    |                          |                    |
| "nurs*"                              | "Neurosc*"               | 1599               |
| "nurs*"                              | "Neuroen*"               | 323                |
| "nurs*"                              | "Neurote*"               | 0                  |
| <b>Neuro-advancements</b>            |                          |                    |
| "nurs*"                              | "virtual reality"        | 204                |
| "nurs*"                              | "brain stimul*"          | 74                 |
| "nurs*"                              | "deep brain stim*"       | 71                 |

|         |                               |    |
|---------|-------------------------------|----|
| "nurs*" | "VR"                          | 47 |
| "nurs*" | "neuroimaging"                | 36 |
| "nurs*" | "ECoG"                        | 29 |
| "nurs*" | "human computer"              | 29 |
| "nurs*" | "DBS"                         | 24 |
| "nurs*" | "cognitive stim*"             | 24 |
| "nurs*" | "neuromodula*"                | 20 |
| "nurs*" | "TMS"                         | 15 |
| "nurs*" | "cochlear implant"            | 15 |
| "nurs*" | "transcranial magnetic stim*" | 14 |
| "nurs*" | "sacral nerve stimulation"    | 9  |
| "nurs*" | "BCI"                         | 7  |
| "nurs*" | "brain imaging"               | 7  |
| "nurs*" | "cognitive enhanc*"           | 6  |
| "nurs*" | "neurostim*"                  | 6  |
| "nurs*" | "neurofeedback*"              | 5  |
| "nurs*" | "spinal cord stimulator"      | 4  |
| "nurs*" | "tDCS"                        | 2  |
| "nurs*" | "brain-computer interface"    | 2  |
| "nurs*" | "transcranial direct current" | 1  |

|         |                                          |   |
|---------|------------------------------------------|---|
|         | stim*"                                   |   |
| "nurs*" | "nootropics"                             | 1 |
| "nurs*" | "brain computer"                         | 1 |
| "nurs*" | "neurosens*"                             | 1 |
| "nurs*" | "cranial electrotherapy stim*"           | 1 |
| "nurs*" | "NSC"                                    | 0 |
| "nurs*" | "neuroinform*"                           | 0 |
| "nurs*" | "cognitive imag*"                        | 0 |
| "nurs*" | "CoriQ"                                  | 0 |
| "nurs*" | "Electrocorticogra*"                     | 0 |
| "nurs*" | "iEEG"                                   | 0 |
| "nurs*" | "intracranial<br>electroencephalography" | 0 |
| "nurs*" | "NFB"                                    | 0 |
| "nurs*" | "brain feedback*"                        | 0 |
| "nurs*" | "EEG biofeedback"                        | 0 |
| "nurs*" | "fEMG"                                   | 0 |
| "nurs*" | "HEG"                                    | 0 |
| "nurs*" | "hemoencephalogra*"                      | 0 |
| "nurs*" | "artificial brain"                       | 0 |

|         |                                          |   |
|---------|------------------------------------------|---|
| "nurs*" | "optogenetics"                           | 0 |
| "nurs*" | "brain inform*"                          | 0 |
| "nurs*" | "artificial hippocampus"                 | 0 |
| "nurs*" | "auditory brainstem"                     | 0 |
| "nurs*" | "bionic eye"                             | 0 |
| "nurs*" | "brain to speech"                        | 0 |
| "nurs*" | "brain-to-text"                          | 0 |
| "nurs*" | "cognitive tech*"                        | 0 |
| "nurs*" | "collaborative cognitive<br>simulations" | 0 |
| "nurs*" | "cortical modem"                         | 0 |
| "nurs*" | "DACI"                                   | 0 |
| "nurs*" | "darpa ram sensor"                       | 0 |
| "nurs*" | "deep mind"                              | 0 |
| "nurs*" | "Ear-EEG"                                | 0 |
| "nurs*" | "Exocortex"                              | 0 |
| "nurs*" | "Facial electromyography"                | 0 |
| "nurs*" | "God Helmet"                             | 0 |
| "nurs*" | "Hippocampus prosthesis"                 | 0 |
| "nurs*" | "Neural stem cell"                       | 0 |



|         |                                        |   |
|---------|----------------------------------------|---|
| "nurs*" | "Neuralink"                            | 0 |
| "nurs*" | "Muse headband"                        | 0 |
| "nurs*" | "Neurochip"                            | 0 |
| "nurs*" | "prosthetic memory device"             | 0 |
| "nurs*" | "pulsed electromagnetic field therapy" | 0 |
| "nurs*" | "Brain machine"                        | 0 |
| "nurs*" | "responsive neurostimulation"          | 0 |
| "nurs*" | "speech BCI"                           | 0 |
| "nurs*" | "subvocal"                             | 0 |
| "nurs*" | "THync mood altering headset"          | 0 |
| "nurs*" | "whole brain emulat*"                  | 0 |

**Table S3:** Hit count results for Canadian newspaper articles mentioning the different Neuro-advancements in conjunction with the root term "nurs\*"

| First Search Term | Second Search Term | Article Count |
|-------------------|--------------------|---------------|
|                   |                    | <b>Total</b>  |
| "nurs*"           |                    | 704 154       |
| <b>Neuroterms</b> |                    |               |
| "nurs*"           | "Neurosc*"         | 704           |
| "nurs*"           | "Neuroen*"         | 82            |

|                          |                                     |     |
|--------------------------|-------------------------------------|-----|
| "nurs*"                  | "Neurote*"                          | 0   |
| <b>Neurotechnologies</b> |                                     |     |
| "nurs*"                  | "Virtual reality"                   | 343 |
| "nurs*"                  | "VR"                                | 146 |
| "nurs*"                  | "Cochlear implant*"                 | 137 |
| "nurs*"                  | "Brain stim*"                       | 109 |
| "nurs*"                  | "brain imaging"                     | 103 |
| "nurs*"                  | "DBS"                               | 91  |
| "nurs*"                  | "BCI"                               | 78  |
| "nurs*"                  | "Deep brain stim*"                  | 72  |
| "nurs*"                  | "TMS"                               | 51  |
| "nurs*"                  | "transcranial magnetic stimulation" | 21  |
| "nurs*"                  | "neuroimaging"                      | 19  |
| "nurs*"                  | "cognitive enhanc*"                 | 9   |
| "nurs*"                  | "human computer"                    | 8   |
| "nurs*"                  | "brain computer"                    | 4   |
| "nurs*"                  | "neurosens*"                        | 4   |
| "nurs*"                  | "neurofeedback"                     | 3   |
| "nurs*"                  | "spinal cord stimulator"            | 3   |
| "nurs*"                  | "artificial brain"                  | 3   |

|         |                                           |   |
|---------|-------------------------------------------|---|
| "nurs*" | "neural stem cell*"                       | 3 |
| "nurs*" | "optogenetics"                            | 2 |
| "nurs*" | "bionic eye"                              | 2 |
| "nurs*" | "neuroinform"                             | 2 |
| "nurs*" | "auditory brainstem"                      | 2 |
| "nurs*" | "nootropics*"                             | 1 |
| "nurs*" | "muse headband"                           | 1 |
| "nurs*" | "transcranial direct current stimulation" | 1 |
| "nurs*" | "brain-computer interface"                | 0 |
| "nurs*" | "neurochip"                               | 0 |
| "nurs*" | "brain machine"                           | 0 |
| "nurs*" | "electrocorticogra*"                      | 0 |
| "nurs*" | "intracranial electroencephalography"     | 0 |
| "nurs*" | "cranial electrotherapy stimulation"      | 0 |
| "nurs*" | "Ear-EEG"                                 | 0 |
| "nurs*" | "Facial electromyography"                 | 0 |
| "nurs*" | "God Helmet"                              | 0 |
| "nurs*" | "Deep mind"                               | 0 |

|         |                                           |   |
|---------|-------------------------------------------|---|
| "nurs*" | "Hemoencephalography"                     | 0 |
| "nurs*" | "Whole brain emulation"                   | 0 |
| "nurs*" | "Neuromodulation"                         | 0 |
| "nurs*" | "Pulsed electromagnetic<br>field therapy" | 0 |
| "nurs*" | "Responsive<br>neurostimulation"          | 0 |
| "nurs*" | "Sacral nerve stimulation"                | 0 |
| "nurs*" | "Cortical modem"                          | 0 |
| "nurs*" | "Hippocampus prosthesis"                  | 0 |
| "nurs*" | "Artificial hippocampus"                  | 0 |
| "nurs*" | "DACI"                                    | 0 |
| "nurs*" | "Exocortex"                               | 0 |
| "nurs*" | "Collaborative cognitive<br>simulations"  | 0 |
| "nurs*" | "Neurostimulation"                        | 0 |
| "nurs*" | "Brain-to-text"                           | 0 |
| "nurs*" | "Brain to speech"                         | 0 |
| "nurs*" | "cognitive tech*"                         | 0 |
| "nurs*" | "Speech BCI"                              | 0 |
| "nurs*" | "Subvocal"                                | 0 |

|         |                                  |   |
|---------|----------------------------------|---|
| "nurs*" | "Neuralink"                      | 0 |
| "nurs*" | "Darpa Ram sensor"               | 0 |
| "nurs*" | "Prosthetic memory device"       | 0 |
| "nurs*" | "THync mood altering<br>headset" | 0 |
| "nurs*" | "cognitive stim*"                | 0 |
| "nurs*" | "ECoG"                           | 0 |
| "nurs*" | "fEMG"                           | 0 |
| "nurs*" | "HEG"                            | 0 |
| "nurs*" | "iEEG"                           | 0 |
| "nurs*" | "NFB"                            | 0 |
| "nurs*" | "NSC"                            | 0 |
| "nurs*" | "tDCS"                           | 0 |
| "nurs*" | "Neural stem cell"               | 0 |
| "nurs*" | "brain feedback*"                | 0 |
| "nurs*" | "brain inform*"                  | 0 |
| "nurs*" | "cognitive imag*"                | 0 |
| "nurs*" | "CoriQ"                          | 0 |
